# Age-independent oxidative stress in elderly patients with non-insulin-dependent diabetes mellitus

S.L. NUTTALL, F. DUNNE<sup>1</sup>, M.J. KENDALL and U. MARTIN

From the Clinical Pharmacology Section, Department of Medicine and <sup>1</sup>Department of Diabetes, Queen Elizabeth Hospital, Edgbaston, Birmingham, UK

Received 22 July 1998 and in revised form 19 October 1998

## Summary

Impaired antioxidant defence is implicated in the development of cardiovascular complications in non-insulin-dependent diabetes (NIDDM). However, as many of these patients are elderly, observed changes in antioxidant status may be due to the patient's age rather than their disease. We sampled blood from 47 elderly NIDDM patients (21 male and 26 female; mean age  $\pm$  SD,  $75.62 \pm 7.97$  years), 66 young (30 male and 36 female;  $24.52 \pm 4.72$  years) and 58 healthy elderly volunteers (17 male and 41 female;  $70.74 \pm 4.85$  years), and measured the antioxidant glutathione, the marker for free-radical-damage lipid hydroperoxide products (LHP), vitamin E and total antioxidant capacity (TAC). There was a significant increase in LHP in the healthy elderly group compared with the young volunteers ( $3.14 \pm 1.5$  vs.  $2.14 \pm 1.38$   $\mu\text{mol/l}$ ,  $p < 0.01$ ). The values were much higher in NIDDM patients ( $7.02 \pm 2.29$   $\mu\text{mol/l}$ ,  $p < 0.0001$  vs. healthy elderly). There was a reduction in TAC in healthy elderly compared with the young ( $359.99 \pm 54.82$  vs.  $471.47 \pm 94.29$   $\mu\text{mol/l}$  trolox equivalents,  $p < 0.0001$ ), but there was no further reduction in NIDDM patients. Similarly, glutathione was

reduced to the same degree in healthy elderly and NIDDM patients ( $0.29 \pm 0.09$ ,  $0.30 \pm 0.11$  vs.  $0.54 \pm 0.19$   $\mu\text{mol/l}$  in young volunteers,  $p < 0.0001$ ). Vitamin E concentrations were comparable in all groups ( $26.34 \pm 5.39$  young volunteers,  $31.50 \pm 8.23$  healthy elderly and  $30.98 \pm 9.03$   $\mu\text{mol/l}$  NIDDM patients), but after correction for serum cholesterol there was a significant reduction in the diabetic group compared with the young, but not with the elderly ( $5.54 \pm 1.55$  vs.  $6.67 \pm 1.86$  vs.  $6.31 \pm 1.85$  ( $\mu\text{mol/l})/(\text{mmol/l})$ ,  $p < 0.01$ ). We have demonstrated an age-dependent reduction in total antioxidant capacity and glutathione defence and an age-independent increase in LHP in elderly patients with NIDDM. Reduced concentrations of vitamin E were demonstrated in NIDDM patients compared with young, but not elderly, volunteers. Increased oxidative damage occurs independently of age in NIDDM patients despite comparable antioxidant defences in this age group.

## Introduction

Free radicals are continuously produced during aerobic metabolism.<sup>1</sup> These unstable species may cause oxidative damage to DNA, carbohydrates, proteins and lipids that are normally counteracted by protective antioxidants. Oxidative defence is provided by a number of enzymes and vitamins, including the chain-breaking scavengers vitamin E, vitamin C and

glutathione.<sup>2–4</sup> In times of increased free radical production, individuals may become deficient in these antioxidants. Incomplete scavenging of reactive radicals leads to oxidation of cellular lipids, proteins, nucleic acids and glycoconjugates which results in fragmentation and cross-linking. This may ultimately lead to cell death with widespread pathological

Address correspondence to S.L. Nuttall, Department of Medicine, Queen Elizabeth Hospital, Edgbaston, Birmingham B15 2TH

© Association of Physicians 1999

consequences.<sup>5</sup> The imbalance between protective antioxidants (antioxidant defence) and increased free radical production, leading to oxidative damage, is known as oxidative stress. An example of this process is oxidation of membrane-bound lipids and lipoproteins known as lipid peroxidation.<sup>6</sup> Oxidation of circulating low-density lipoprotein (LDL) has been linked to the initiation and progression of atherosclerosis and ultimately to the pathogenesis of cardiovascular disease.<sup>7</sup>

Oxidative stress has been implicated in many diseases associated with ageing<sup>8</sup> and in the ageing process itself.<sup>9</sup> We have recently demonstrated that advanced age, in the absence of disease, is associated with decreased antioxidant defence and increased oxidative damage.<sup>10</sup> The degree of oxidative stress was accentuated in chronic illness, particularly if increasing severity or an acute event was serious enough to require hospital admission.

Morbidity and mortality are increased in patients with NIDDM when compared with the general population, particularly in relation to coronary artery disease. One possible explanation for this is that oxidative stress may be a contributory factor. It is well established that there is an increased production of damaging free radicals in NIDDM patients that may be due to auto-oxidation of glucose and glycosylated proteins.<sup>5,11–13</sup>

However, most patients with NIDDM are elderly and if poor antioxidant defence is to be implicated in the development of vascular complications, then age-related perturbations in those parameters must be taken into account. This study was designed to determine whether observed changes in oxidative stress in elderly NIDDM patients were a manifestation of the illness or simply a reflection of the ageing process itself.

## Methods

### Patients

We studied 66 young healthy volunteers (30 male and 36 female, mean age  $\pm$ SD  $24.5 \pm 4.7$  years) and 58 healthy elderly subjects (17 male and 41 female,  $70.7 \pm 4.8$  years) recruited from a sample of community-based individuals. Health was defined as an absence of major medical or surgical illness in the previous 5 years, no hospital admissions, no current medication, and a subjective perception of good health as determined by health questionnaire. These individuals were compared with 47 elderly patients (21 male and 26 female,  $75.6 \pm 8.0$  years) with non-insulin-dependent diabetes (NIDDM) attending the Diabetes Resource Centre at a University Teaching Hospital. Patients were receiving either diet only (8),

diet plus oral hypoglycaemic agents (30) or diet and insulin (9) for glycaemic control. The majority of patients studied had evidence of vascular complications including hypertension, coronary artery disease (CAD), peripheral vascular disease (PVD) and cerebrovascular disease (CVD), but none had been hospitalized in the previous 6 months. In addition to their diabetic medication, the majority of patients were also receiving antihypertensive and antianginal agents. Diabetes control was assessed by glycated haemoglobin (HbA<sub>1c</sub>) measurements. The study was approved by the Local Medical Ethical Committee, and all volunteers and patients gave informed written consent.

### Sample collection

Venous blood (non-fasting) was sampled into plain tubes for measurements of serum cholesterol, TAC and vitamin E and into EDTA and lithium-heparin tubes for measurement of total glutathione and LHP, respectively. Samples were placed on ice and centrifuged within an hour at 3500 rpm, 4°C for 15 min. To ensure stability of glutathione, plasma was treated with 30% perchloric acid (PCA). After mixing thoroughly, samples were centrifuged at 11000 rpm for 5 min and stored at  $-80^{\circ}\text{C}$  until analysis. Samples from the healthy elderly group were collected in the community.

### Assays

Total plasma glutathione was measured by enzyme-rate assay using the colorimetric dye 5,5'-dithio-bis(2-nitrobenzoic) acid (DTNB).<sup>14</sup> This method relies on the recycling of the oxidized and reduced forms of glutathione by the enzyme glutathione reductase, determined by spectrophotometry at a wavelength of 412 nm. Lipid hydroperoxides (LHP) were determined by the ferrous-oxidation of the colorimetric dye xylenol orange at a wavelength of 560 nm in conjunction with the specific hydroperoxide discriminant triphenylphosphine as described by Nourooz-Zadeh *et al.*<sup>15</sup> TAC was determined by enhanced chemiluminescence.<sup>16</sup> Vitamin E concentrations were determined by reverse-phase high-performance liquid chromatography (HPLC) with UV-detection at 292 nm using tocopherol acetate as internal standard.<sup>17</sup> Serum cholesterol was measured by standard enzymic assay.

### Statistics

A minimum sample size of 47 was needed to detect a 20% change in measures of oxidative stress having 80% power at the 95% confidence limit. Results are expressed as mean  $\pm$ SD. Statistical difference between groups was determined by analysis of

variance (ANOVA). The level of significance was taken as  $p < 0.05$ . To determine correlation between variables, a Pearson linear regression model was used.

## Results

### Oxidative defence

Plasma glutathione concentrations were significantly reduced in healthy elderly volunteers compared with young controls (mean  $\pm$  SD  $0.29 \pm 0.09$  and  $0.54 \pm 0.19$   $\mu\text{mol/l}$ ,  $p < 0.0001$ ) (Figure 1, Table 1). Patients with NIDDM had comparable glutathione concentrations to the healthy elderly. Similarly, TAC measurements were significantly reduced in both healthy elderly volunteers and diabetic patients compared with the young ( $360.0 \pm 55$   $\mu\text{mol/l}$ ,  $386.4 \pm 99$

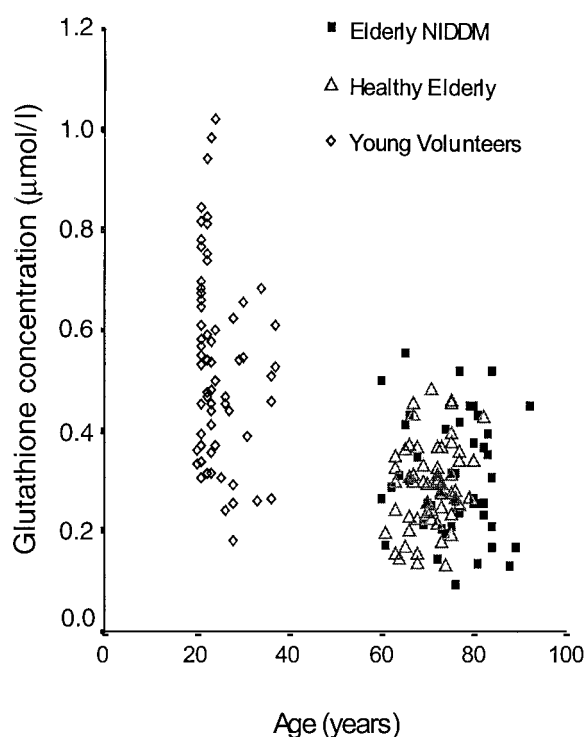

**Figure 1.** Plasma glutathione concentrations in healthy individuals and elderly patients with NIDDM.

**Table 1** Oxidative stress measurements in healthy elderly individuals and elderly individuals with NIDDM compared with young volunteers

|                     | LHP<br>( $\mu\text{mol/l}$ ) | TAC<br>( $\mu\text{mol/l}$ trolox) | GSH<br>( $\mu\text{mol/l}$ ) | Vitamin E<br>( $\mu\text{mol/l}$ ) | Vitamin E/Cholesterol<br>( $\mu\text{mol/l}$ )/(mmol/l) |
|---------------------|------------------------------|------------------------------------|------------------------------|------------------------------------|---------------------------------------------------------|
| Young volunteers    | $2.14 \pm 1.38$              | $471.5 \pm 94.3$                   | $0.54 \pm 0.19$              | $26.3 \pm 5.4$                     | $6.67 \pm 1.86$                                         |
| Healthy elderly     | $3.14 \pm 1.50^*$            | $360.0 \pm 54.8^*$                 | $0.29 \pm 0.09^{**}$         | $31.5 \pm 8.2$                     | $6.31 \pm 1.85$                                         |
| Patients with NIDDM | $7.02 \pm 2.29^{***}$        | $386.4 \pm 99.8^*$                 | $0.30 \pm 0.11^{**}$         | $31.0 \pm 9.0$                     | $5.54 \pm 21.4^*$                                       |

Results are means  $\pm$  SD. LHP, lipid hydroperoxide products; TAC, total antioxidant capacity; GSH, glutathione.  $^*P < 0.01$   $^{**}P < 0.0001$  compared with young volunteers.  $^{***}P < 0.0001$  compared with healthy elderly.

vs.  $471.5 \pm 94$ ,  $p < 0.01$ ). Despite this, there were no significant changes in vitamin E in any of the groups studied (Table 1). However, after correction for serum cholesterol, there was a significant reduction in vitamin E in the diabetic group compared to the young volunteers ( $5.54 \pm 1.55$  vs.  $6.67 \pm 1.86$  ( $\mu\text{mol/l}$ )/(mmol/l),  $p < 0.01$ ). Although the diabetic patients also had lower cholesterol-corrected vitamin E concentrations than the healthy elderly, the differences were not significant.

### Oxidative damage

There was evidence of increased oxidative damage with age. A modest, but significant increase in LHP occurred in the healthy elderly population compared with young volunteers ( $2.14 \pm 1.4$  and  $3.14 \pm 1.5$   $\mu\text{mol/l}$ ,  $p < 0.01$ ). In patients with diabetes, the increase in LHP was striking at  $7.0 \pm 2.3$   $\mu\text{mol/l}$ ,  $p < 0.0001$  (Figure 2).

All NIDDM patients had reasonable glycaemic control (HbA<sub>1c</sub>  $8.7 \pm 1.2\%$ ), and there was no correlation between HbA<sub>1c</sub> and lipid peroxidation levels ( $r^2 = 0.002$ ). Similarly, there was no correlation between BMI or smoking history and markers of oxidative stress in the diabetic patients.

## Discussion

Patients with NIDDM have an increased mortality and morbidity compared with non-diabetics and are more likely to develop CAD, cerebrovascular and peripheral vascular disease.<sup>18</sup> This excess risk for vascular disease can only partly be explained by the traditional risk factors for the general population such as smoking, hypertension and raised cholesterol.<sup>19</sup> It has been proposed that oxidative stress may be associated with the pathogenesis of the complications of non-insulin-dependent diabetes (NIDDM), particularly vascular disease.<sup>5,12</sup>

Previous studies are consistent with our own findings of increased oxidative stress in NIDDM. Sundaram *et al.* studied patients with NIDDM in their fifth and sixth decades, and showed an increase

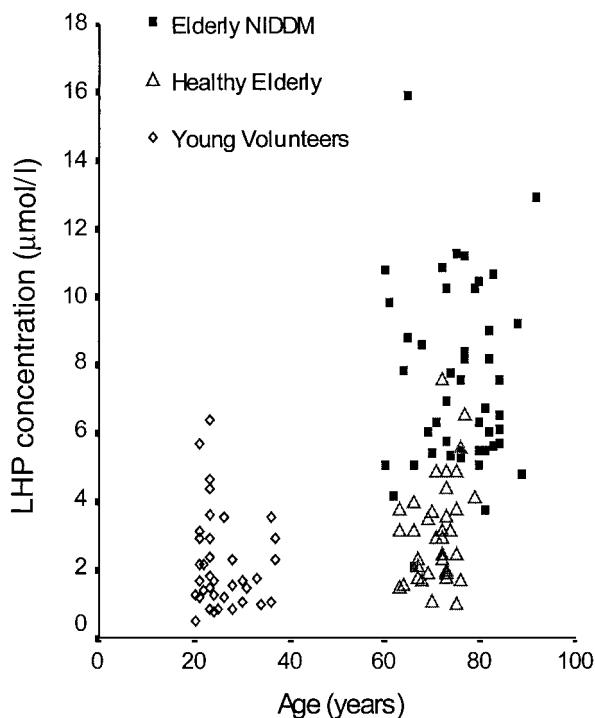

**Figure 2.** Plasma LHP concentrations in healthy individuals and elderly patients with NIDDM.

in lipid peroxidation from the onset of disease.<sup>20</sup> This became progressively worse with time and with the development of complications. The method used has been criticized, however (i.e. the simple TBARS assay), because it measures many parameters in addition to lipid peroxidation, and is affected by the lipid content of the sample.<sup>21</sup> Using the ferrous-oxidation of xylenol orange assay to determine lipid hydroperoxides, Nourooz-Zadeh *et al.* suggested that changes in oxidative stress were related to the underlying metabolic abnormalities in NIDDM rather than to the onset of complications.<sup>21</sup> This is supported by the finding of raised lipid peroxidation products in patients with impaired glucose tolerance (IGT), even before the onset of frank diabetes.<sup>22</sup>

Studies have consistently demonstrated deficiency in individual antioxidants in NIDDM patients<sup>20-23</sup> with reduced concentrations of glutathione, vitamin C and the antioxidant enzymes superoxide dismutase (SOD) and catalase as well as a decrease in total radical trapping antioxidant parameter (TRAP), suggestive of reduced total antioxidant defence.<sup>23</sup> Some,<sup>20,21</sup> but not all, authors found a decrease in vitamin E in patients with NIDDM even when corrected for serum cholesterol. Surprisingly, Ceriello *et al.* demonstrated a cholesterol-adjusted increase in vitamin E despite reduced TRAP in diabetic patients.<sup>23</sup> Overall, these studies suggest that oxidative stress and impaired antioxidant defence is a feature of NIDDM that is present early in the disease

and may contribute to its progression and even to the development of complications.

One issue that has not previously been addressed is the impact of age on antioxidant status in NIDDM. Many patients who develop diabetic complications are elderly, so perturbations in oxidative stress parameters may simply reflect the ageing process. In the present study, we have clearly demonstrated that NIDDM patients developed oxidative damage in excess of that expected from age-matched controls. This was apparent despite similar reductions in antioxidant defence including TAC, glutathione and vitamin E in the healthy elderly and diabetic groups. Elderly NIDDM patients are therefore more susceptible to free-radical-induced damage than can be accounted for by normal ageing. Possible explanations for this include poor functioning of protective antioxidants in elderly diabetics, or greatly increased amounts of free radicals that overwhelm the defence system in this condition.

Oxidation of low-density lipoprotein (LDL) cholesterol is a key step in the formation of atheroma and is thought to be a major factor in the development of cardiovascular disease.<sup>7,24</sup> This may be of particular importance in patients with NIDDM, because in addition to raised total LDL cholesterol levels, they tend to have a pro-atherogenic lipid profile composed of small dense LDL particles, raised triglycerides and moderately raised cholesterol.<sup>19,25-28</sup> Small, dense LDL particles are known to be more readily oxidized than larger particles, partly because they have less protective vitamin E.<sup>29-31</sup> Once modified, they are taken up by macrophages in the arterial intima via the scavenger receptor, eventually forming foam cells, which predispose to the formation of atherosclerotic plaques.<sup>32</sup>

The increased oxidative damage that we have demonstrated in elderly patients with NIDDM may therefore predispose to the development of atherosclerosis. This is apparent despite comparable antioxidant defence in age-matched controls. We propose that these patients may have supernormal requirements for antioxidants. Supplementation, with known free radical scavengers such as vitamins E and C, have a potential role in boosting antioxidant defence<sup>33,34</sup> and may be important in this group.

It has been established that consumption of fruit and vegetables rich in antioxidant vitamins is associated with a lower risk of death from coronary disease.<sup>35-37</sup> Vitamin supplementation, particularly with vitamin E, may yet prove to have an additional protective role, but intervention studies have not clarified what the appropriate dose is or for how long supplementary vitamins should be taken.<sup>38-42</sup> In addition, scavenging antioxidants act synergistically,<sup>43,44</sup> so supplementation with two or more may enhance their individual effects. Following the

demonstration of increased oxidative damage in elderly patients with NIDDM highlighted in this study, further studies are now needed to assess the role of antioxidant supplementation in those patients with and without clinically apparent cardiovascular disease.

## References

- Halliwell B. Oxygen radicals: a common-sense look at their nature and medical importance. *Lancet* 1984; **i**:1328–9.
- Halliwell B. Antioxidants and human disease: a general introduction. *Nutrition Rev* 1997; **55**:S44–52.
- Halliwell B, Gutteridge JMC. *Free radicals in biology and medicine*, 2nd edn. Oxford, Oxford University Press, 1989.
- Sies H. Strategies of antioxidant defence. *Eur J Biochem* 1993; **215**:213–19.
- Baynes JW. Perspective in diabetes. Role of oxidative stress in development of complication in diabetes. *Diabetes* 1991; **40**:405–412.
- Gutteridge JMC. Lipid peroxidation and antioxidants as biomarkers of tissue damage. *Clin Chem* 1995; **41**:1819–28.
- Steinberg D, Parthasarathy S, Carew TE, Khoo JC, Witztum JL. Beyond cholesterol: Modifications of low-density lipoprotein that increase its atherogenicity. *N Engl J Med* 1989; **320**:915–23.
- Ames BN, Shigenaga MK, Hagen TM. Oxidants, antioxidants and the degenerative diseases of ageing. *Proc Natl Acad Sci* 1993; **90**:7915–22.
- Pryor WA. The free-radical theory of ageing revisited: A critique and a suggested disease-specific theory. In: Warner HR *et al.*, eds. *Modern Biological Theories of Ageing*. New York, Raven Press, 1987.
- Nuttall SL, Martin U, Sinclair AJ, Kendall MJ. Glutathione: in sickness and in health. *Lancet* 1998; **351**:645–6.
- Jones AF, Jennings PE, Winkles J, Lunec J, Barnett AH. Impaired serum antioxidant activity in diabetic microangiopathy. *Diabetic Med* 1985; **2**:502.
- Giugliano D, Ceriello A, Paolisso G. Diabetes mellitus, hypertension and cardiovascular disease: which role for oxidative stress? *Metabolism* 1995; **44**:363–8.
- Lyons TJ. Oxidised LDL: a role in the pathogenesis of atherosclerosis in diabetes? *Diabetic Med* 1991; **8**:411–19.
- Beutler E, Gelbart T. Plasma glutathione in health and in patients with malignant disease. *J Lab Clin Med* 1985; **105**:581–4.
- Nourooz-Zadeh J, Tajaddini-Sarmadi J, Wolff SP. Measurement of plasma hydroperoxide concentrations by the ferrous-oxidation-xylene orange assay in conjunction with triphenylphosphine. *Anal Biochem* 1994; **220**:403–9.
- Whitehead TP, Thorpe GHG, Maxwell SRJ. Enhanced chemiluminescent assay for antioxidant capacity in biological fluids. *Analyt Chim Acta* 1992; **266**:265–77.
- Milne DB and Botnen J. Retinol, alpha-tocopherol, lycopene, alpha- and beta-carotene simultaneously determined in plasma by isocratic liquid chromatography. *Clinical Chemistry* 1986; **32** (5):874–6.
- Kannel WB, McGee DL. Diabetes and cardiovascular disease. The Framingham Study. *JAMA* 1979; **241**: 2035–8.
- Turner RC, Millns H, Neil HAW, Stratton IM, Manley SE, Matthews DR, Holman RR. Risk factors for coronary artery disease in non-insulin dependent diabetes mellitus: United Kingdom Prospective Diabetes Study (UKPDS: 23). *Br Med J* 1998; **316**:823–8.
- Sundaram RK, Bhaskar A, Vijayalingam S, Viswanathan M, Mohan R, Shanmugasundaram KR. Antioxidant status and lipid peroxidation in type II diabetes mellitus with and without complications. *Clin Sci* 1996; **90**:255–60.
- Nourooz-Zadeh J, Rahimi A, Tajaddini-Sarmadi J, Tritschler H, Rosen P, Halliwell B, Betteridge DJ. Relationships between plasma measures of oxidative stress and metabolic control in NIDDM. *Diabetologia* 1997; **40**:647–53.
- Vijayalingam S, Parthiban A, Shanmugasundaram KR, Mohan V. Abnormal antioxidant status in impaired glucose tolerance and non-insulin-dependent diabetes mellitus. *Diabetic Med* 1996; **13**:715–19.
- Ceriello A, Bortolotti N, Falletti E, Taboga C, Tonutti L, Crescentini A, Motz E, Lizzio S, Russo A, Bartoli E. Total radical-trapping antioxidant parameter in NIDDM patients. *Diabetes Care* 1997; **20**:194–7.
- Rajman I, Maxwell S, Cramb R, Kendall M. Particle size: the key to the atherogenic lipoprotein? *Q J Med* 1994; **87**:709–20.
- Stewart MW, Laker MF, Dayer RG, Game F, Mitcheson J, Winocour PH, Alberti KG. Lipoprotein compositional abnormalities and insulin resistance in type II diabetic patients with mild hyperlipidaemia. *Arterioscler Thromb* 1993; **13**:1046–52.
- Feingold KR, Grunfeld C, Pang M, Doerrler M, Krauss RM. LDL subclass phenotypes and triglyceride metabolism in NIDDM. *Arterioscler Thromb* 1992; **12**:1496–502.
- Sobenin LA, Tertov VV, Koschinsky T, Bunting CE, Slavina ES, Dedov II, Orekhov AN. Modified LDL from diabetic patients causes cholesterol accumulation in human aortic cells. *Atherosclerosis* 1993; **100**:41–54.
- Selby JV, Austin MA, Newman B, Zhang D, Quesenberry CP, Mayer EJ, Krauss RM. LDL subclass phenotypes and the insulin resistance syndrome in women. *Circulation* 1993; **88**:381–7.
- Dejager S, Brukert E, Chapman MJ. Dense LDL subspecies with diminished oxidative resistance predominate in combined hyperlipidaemia. *J Lipid Res* 1993; **34**:295–308.
- Tribble DL, Van der Berg JTM, Motchnik PA, Ames BN, Lewis DM, Chait A, Krauss RM. Oxidative susceptibility of low density lipoprotein subfractions is related to their ubiquinol-10 and alpha-tocopherol content. *Proc Natl Acad Sci USA* 1994; **91**:1183–7.
- Esterbauer H, Gebicki J, Puhl H, Jurgens G. The role of lipid peroxidation and antioxidants in oxidative modification of LDL. *Free Radical Biol Med* 1992; **13**:341–90.
- Hurt-Camejo E, Camejo G, Rosengreen B, Lopez F, Wiklund O, Bonders G. Differential uptake of proteoglycan selected subfractions of LDL by human macrophages. *J Lipid Res* 1990; **31**:1387–98.
- Dieber-Rotheneder M, Puhl H, Waeg G, Striegl G, Esterbauer H. Effect of oral supplementation with D- $\alpha$ -tocopherol on the vitamin E content of human low density lipoproteins and resistance to oxidation. *J Lipid Res* 1991; **32**:1325–32.
- Porkkala-Sarataho E, Nyssönen K, Salonen JT. Increased oxidation resistance of atherogenic plasma lipoproteins at high vitamin E levels in non-vitamin E supplemented men. *Atherosclerosis* 1996; **124**:83–94.
- Gjonca A, Bobak M. Albanian paradox, another example of

- protective effect of Mediterranean lifestyle? *Lancet* 1997; **350**:1815–17.
36. Key TJA, Thorogood M, Appleby PN, Burr ML. Dietary habits and mortality in 11000 vegetarians and health conscious people: results of a 17 year follow up. *Br Med J* 1996; **313**:775–9.
37. Renaud S, De Lorgeril M. Wine, alcohol, platelets, and the French paradox for coronary heart disease. *Lancet* 1992; **339**:1523–6.
38. Rimm EB, Stampfer MJ, Ascherio A, Giovannucci E, Colditz GA, Willett WC. Vitamin E consumption and the risk of coronary heart disease in men. *N Engl J Med* 1993; **328**:1450–6.
39. Stampfer MJ, Hennekens CH, Manson JE, Colditz GA, Rosner B, Willett WC. Vitamin E consumption and the risk of coronary disease in women. *N Engl J Med* 1993; **328**:1444–9.
40. Riemersma RA. Coronary heart disease and vitamin E. *Lancet* 1996; **347**:776.
41. Kushi LH, Rolsom AR, Prineas RJ, Mink PJ, Wu Y, Bostick RM. Dietary antioxidant vitamins and death from coronary heart disease in post-menopausal women. *N Engl J Med* 1996; **334**:1156–62.
42. Stephens NG, Parsons A, Schofield PM, Kelly F, Cheeseman K, Mitchinson MJ. Randomised controlled trial of vitamin E in patients with coronary disease: Cambridge Heart Antioxidant Study (CHAOS). *Lancet* 1996; **347**:781–6.
43. Packer JE, Slater TF, Wilson RL. Direct observation of free radical interaction between vitamin E and vitamin C. *Nature* 1979; **278**:737.
44. Freisleben H, Packer L. Free-radical scavenging activities, interactions and recycling of antioxidants. *Biochem Soc Trans* 1993; **21**:325–30.
